# Supplementary material
Source: MDPI journal article supplement (https://www.mdpi.com/2077-1312/12/3/487)
Supplement: s1 [file s1]

**Table S5. The result of kappa analysis.**

|                  | Kappa value | Match% | Level of agreement |
|------------------|-------------|--------|--------------------|
| AMBI / BENTIX    | 0.14        | 83.3   | Very low           |
| AMBI / BPA       | -0.032      | 78.3   | Null               |
| AMBI / BPI       | 0.227       | 90     | Low                |
| AMBI / ISEP      | -0.033      | 43.3   | Null               |
| AMBI / M-AMBI    | 0.066       | 68.3   | Very low           |
| AMBI / W-value   | 0.018       | 36.7   | Null               |
| BENTIX / BPA     | 0.731       | 91.7   | Very good          |
| BENTIX / BPI     | 0.741       | 93.3   | Very good          |
| BENTIX / ISEP    | 0.122       | 53.3   | Very low           |
| BENTIX / M-AMBI  | 0.451       | 78.3   | Moderate           |
| BENTIX / W-value | 0.104       | 46.7   | Very low           |
| BPA / BPI        | 0.568       | 88.3   | Good               |
| BPA / ISEP       | 0.214       | 58.3   | Low                |
| BPA / M-AMBI     | 0.333       | 78.3   | Low                |
| BPA / W-value    | 0.104       | 48.3   | Very low           |
| BPI / ISEP       | 0.133       | 53.3   | Very low           |
| BPI / M-AMBI     | 0.328       | 75     | Low                |
| BPI / W-value    | 0.133       | 46.7   | Very low           |
| ISEP / M-AMBI    | 0.194       | 58.3   | Very low           |
| ISEP / W-value   | 0.725       | 86.7   | Very good          |
| M-AMBI / W-value | 0.242       | 58.3   | Low                |
