# Supplementary material
Source: MDPI journal article supplement (https://www.mdpi.com/2077-1312/12/3/487)
Supplement: s1 [file s1]

**Table S2.** The categorisation of macrobenthos into ecological groups and functional groups for the AMBI and the BPI.

| Species                             | AMBI groups | BPI groups |
|-------------------------------------|-------------|------------|
| <i>Ampelisca</i> sp.                | EGI         | N1         |
| <i>Archaeomysis vulgaris</i>        | EGI         | N1         |
| <i>Armandia lanceolata</i>          | EGI         | N3         |
| <i>Batillaria cumingii</i>          | EGII        | NA         |
| <i>Birubius</i> sp.                 | EGII        | N1         |
| <i>Bodotria</i> sp.                 | EGII        | N3         |
| Capitellidae                        | EGV         | N3         |
| Caprellloidea                       | EGII        | NA         |
| Caridea                             | NA          | N1         |
| Caudinidae                          | NA          | NA         |
| Chaetopteridae                      | EGI         | N1         |
| <i>Chaetozone</i> sp.               | EGIV        | N2         |
| Cirolanidae                         | EGI         | N2         |
| Copepoda                            | NA          | N1         |
| Corophiidae                         | EGI         | N2         |
| <i>Corophium</i> sp.                | EGI         | N2         |
| <i>Diastylis</i> sp.                | EGI         | N2         |
| Diptera                             | EGIV        | N4         |
| Diptera larva                       | EGIV        | N4         |
| <i>Dosinia (Phacosoma) japonica</i> | EGI         | N1         |
| Enteropneusta                       | EGII        | N1         |
| <i>Eohaustorius longiclactylus</i>  | EGI         | N1         |

---

|                                 |       |    |
|---------------------------------|-------|----|
| <i>Eulimella marmorea</i>       | EGI   | NA |
| <i>Euzonus</i> sp.              | EGI   | N3 |
| <i>Gammarus</i> sp.             | EGI   | N1 |
| <i>Glycera capitata</i>         | EGII  | N1 |
| <i>Gomphina veneriformis</i>    | EGI   | N1 |
| <i>Haustorioides koreanus</i>   | EGII  | N1 |
| <i>Hemigrapsus penicillatus</i> | EGII  | N2 |
| Holothuroidea                   | EGI   | N2 |
| Isopoda                         | NA    | NA |
| <i>Kellia</i> sp.               | EGI   | N1 |
| <i>Lepidonotus</i> sp.          | EGII  | N1 |
| Leptostraca                     | EGII  | NA |
| <i>liella</i> sp.               | EGI   | N1 |
| <i>Littorina brevicula</i>      | EGII  | NA |
| <i>Lumbrineris japonica</i>     | EGII  | N3 |
| <i>Lunatia fortunei</i>         | EGII  | N1 |
| Lysianassidae                   | EGI   | N1 |
| <i>Macoma praetexta</i>         | EGIII | N1 |
| <i>Macrophthalmus dilatatus</i> | EGI   | N2 |
| <i>Mactra chinensis</i>         | EGI   | N1 |
| <i>Mactra veneriformis</i>      | EGII  | N1 |
| <i>Mactrinula dolabrata</i>     | EGI   | NA |
| <i>Magelona japonica</i>        | EGI   | N2 |
| <i>Mandibulophoxus mai</i>      | EGI   | N1 |

---

---

|                                    |       |    |
|------------------------------------|-------|----|
| Megalopa                           | NA    | NA |
| <i>Micronephthys oligobranchia</i> | EGII  | N2 |
| <i>Moerella hilaris</i>            | EGI   | N2 |
| <i>Monoculodes</i> sp.             | EGI   | N2 |
| <i>Nassarius noguchii</i>          | EGII  | N1 |
| Nematoda                           | EGIII | N3 |
| Nemertea                           | EGIII | N2 |
| <i>Notomastous latericens</i>      | EGIII | N3 |
| <i>Nuttallia japonica</i>          | EGI   | N1 |
| <i>Onuphis geophiliformis</i>      | EGII  | N1 |
| Paguroidea                         | EGII  | NA |
| <i>Paranamixis</i> sp.             | NA    | NA |
| <i>Paranthura japonica</i>         | EGIII | N2 |
| <i>Perinereis aibuhitensis</i>     | EGIII | NA |
| <i>Philine vitrea</i>              | EGII  | N1 |
| Phoxocephalidae                    | EGI   | N1 |
| <i>Polyonyx asiaticus</i>          | NA    | NA |
| <i>Portunus trituberculatus</i>    | EGI   | NA |
| Pycnogonida                        | EGII  | N1 |
| <i>Pygospio</i> sp.                | EGIII | N3 |
| <i>Rudutapes philippinarum</i>     | EGIII | N1 |
| <i>Schistomeringos</i> sp.         | EGII  | N2 |
| <i>Scolelepis</i> sp.              | EGIII | N3 |
| <i>Scoloplos armiger</i>           | EGIII | N3 |

---

---

|                            |       |    |
|----------------------------|-------|----|
| <i>Scopimera globosa</i>   | EGI   | N2 |
| <i>Serratina capsoides</i> | EGI   | NA |
| <i>Sigambra hanaokai</i>   | EGII  | N2 |
| <i>Siliqua pulchella</i>   | EGII  | N1 |
| <i>Solen strictus</i>      | EGI   | N1 |
| <i>Spio</i> sp.            | EGIII | N2 |
| Spioidae                   | NA    | NA |
| <i>Spiophanes</i> sp.      | EGIII | N2 |
| <i>Stegocephalus</i> sp.   | EGI   | N1 |
| <i>Syllidae</i>            | NA    | NA |
| <i>Travisia japonica</i>   | EGI   | N3 |
| <i>Umbonium thomasi</i>    | EGII  | N2 |
| <i>Upogebia major</i>      | EGI   | N2 |
| <i>Urothoe convexa</i>     | EGI   | N1 |

---

EGI: disturbance-sensitive species; EGII: disturbance-indifferent species; EGIII: disturbance-tolerant species; EGIV: second-order opportunistic species; EGV: first-order opportunistic species; N1: filter feeders or large carnivores; N2: surface deposit feeders or small carnivores; N3: subterranean deposit feeders; N4: opportunistic species; NA: not assigned.
