# Supplementary material
Source: MDPI journal article supplement (https://www.mdpi.com/2077-1312/12/3/487)
Supplement: s1 [file s1]

**Table S1a.** The quantification of urbanisation indicators and estimation of urbanisation index value on ten sandy beaches in June.

| June                         | Baekssajang | Sambong | Giji  | Anmyeon | Batkkae | Bangpo | Kkotjji | Saetppyol | Jangsampo | Baramarae |
|------------------------------|-------------|---------|-------|---------|---------|--------|---------|-----------|-----------|-----------|
| Proximity to urban centers   | 3           | 2       | 1     | 1       | 2       | 3      | 3       | 1         | 1         | 0         |
| Buildings on the sand        | 2           | 2       | 2     | 2       | 2       | 3      | 4       | 2         | 2         | 2         |
| Cleaning of the beach        | 0           | 0       | 0     | 0       | 0       | 0      | 1       | 0         | 0         | 0         |
| Solid waste in the sand      | 1           | 2       | 2     | 2       | 2       | 3      | 3       | 2         | 2         | 5         |
| Vehicles traffic on the sand | 0           | 0       | 0     | 0       | 2       | 0      | 3       | 2         | 3         | 3         |
| Quality of the night sky     | 2           | 2       | 2     | 2       | 2       | 4      | 5       | 2         | 2         | 2         |
| Frequency of visitors        | 2           | 3       | 2     | 2       | 2       | 3      | 5       | 2         | 2         | 3         |
| Urbanization index value     | 0.286       | 0.314   | 0.257 | 0.257   | 0.34    | 0.457  | 0.686   | 0.314     | 0.343     | 0.429     |

**Table S1b.** The quantification of urbanisation indicators and estimation of urbanisation index value on ten sandy beaches in September.

| September                    | Baekssajang | Sambong | Giji  | Anmyeon | Batkkae | Bangpo | Kkotjji | Saetpppyol | Jangsampo | Baramarae |
|------------------------------|-------------|---------|-------|---------|---------|--------|---------|------------|-----------|-----------|
| Proximity to urban centers   | 3           | 2       | 1     | 1       | 2       | 3      | 3       | 1          | 1         | 0         |
| Buildings on the sand        | 2           | 2       | 2     | 2       | 2       | 3      | 4       | 2          | 2         | 2         |
| Cleaning of the beach        | 0           | 0       | 0     | 0       | 0       | 0      | 1       | 0          | 0         | 0         |
| Solid waste in the sand      | 2           | 3       | 2     | 2       | 3       | 4      | 4       | 3          | 3         | 5         |
| Vehicles traffic on the sand | 0           | 0       | 0     | 0       | 2       | 0      | 3       | 2          | 3         | 3         |
| Quality of the night sky     | 2           | 2       | 2     | 2       | 2       | 4      | 5       | 2          | 2         | 2         |
| Frequency of visitors        | 2           | 3       | 2     | 2       | 2       | 3      | 5       | 2          | 2         | 3         |
| Urbanization index value     | 0.314       | 0.343   | 0.257 | 0.257   | 0.371   | 0.486  | 0.714   | 0.371      | 0.371     | 0.429     |
